# Supplementary material
Source: MDPI journal article supplement (https://www.mdpi.com/2071-1050/12/7/2768)
Supplement: s1 [file s1]

## Toestemmingsformulier – Informed Consent (English version on the next page)

Betreft:

Onderzoek Michiel Hooykaas van de Universiteit Leiden – Afdeling Science Communication & Society

### **Geïnterviewde**

Ik begrijp dat:

- ik mijn medewerking aan dit onderzoek ieder moment kan stoppen zonder opgave van reden
- gegevens anoniem worden verwerkt, zonder herleidbaar te zijn tot de persoon
- de geluidsopname vertrouwelijk wordt behandeld en alleen gebruikt zal worden voor dit onderzoek

Ik verklaar dat:

- ik geheel vrijwillig bereid ben aan dit onderzoek mee te doen
- de citaten en uitkomsten van dit interview gebruikt mogen worden in een wetenschappelijke publicatie, verslag, presentatie of andere communicatievorm
- toestemming geef om het interview op te laten nemen via een geluidsrecorder

Naam:

Geboortejaar:

Handtekening:

Datum:

### **Onderzoeker**

Ik heb mondeling toelichting verstrekt over de aard van het onderzoek. Ik verklaar mij bereid nog opkomende vragen over het onderzoek naar vermogen te beantwoorden.

Naam:

Handtekening:

Datum:

## Written Consent Form - Informed Consent

Concerning:

Research Project Michiel Hooykaas from Leiden University – Department of Science Communication & Society

### **Interviewee**

I understand that:

- I can withdraw myself from the research at any time without having to provide reasons for this
- data will be processed anonymously, without being traceable to the person
- the audio recording will be treated confidentially and will only be used for this research project

I declare that:

- I am willing to participate in this study voluntarily
- the quotes and results of this interview may be used in a scientific publication, report, presentation or other form of communication
- I give permission for the interview to be recorded with a voice recorder

Name:

Year of birth:

Autograph:

Date:

### **Researcher**

I have provided information about the nature of the research project orally. I declare my willingness to answer future questions about the research to the best of my capabilities.

Name:

Autograph:

Date:
