# Supplementary material
Source: MDPI journal article supplement (https://www.mdpi.com/2071-1050/12/7/2768)
Supplement: s1 [file s1]

## **Kapstok Interview (English version at pages 4-6)**

### **Inleiding:**

Bedanken voor gesprek  
Korte uitleg onderzoek en interview  
Consent Form

### **Biodiversiteit & Rol Biodiversiteit in Functie (en daarbuiten)**

- Voor de helderheid van dit gesprek wil ik graag beginnen met de volgende vraag: Wat is volgens jou biodiversiteit?
- Zou je me kunnen vertellen op welke manier jij in jouw functie (werk) te maken hebt met biodiversiteit (of natuur)?
  - Concrete voorbeelden?
  - Doorvragen; met name ook over functie waarin gecommuniceerd wordt.
  - Met wie communiceer je?
  - Functie 1, functie 2...
- Wat voor biologische kennis gebruik jij tijdens het beoefenen van jouw functie?
  - Abstracte begrippen/Concreet?
  - Passieve/Actieve kennis?
  - Voorbeelden?
  - Taxonomie/Soorten kennis – welke rol speelt deze kennis/hoe gebruik je die?
  - Sommige typen kennis belangrijker dan andere?

**Korte samenvattende zin:** Je geeft aan dat je bepaalde biologische kennis (kennis van biodiversiteit) nodig hebt om jouw functie te kunnen uitoefenen.

- Je hebt in jouw functie(s) te maken hebt met biodiversiteit/natuur. Als jij een tekst schrijft/boodschap voorbereidt voor jouw doelgroep (kinderen/algemeen publiek?)...
  - Hoe zorg je er dan voor dat jouw boodschap voor de doelgroep begrijpelijk is en aanspreekt? (Vaktaal?)
  - hoe weet je wat jouw doelgroep begrijpt/weet? (inschatting voorkennis?)
  - merk je wel eens dat je 'te hoog of te laag inzet'? Voorbeelden?
  - (- wat probeer je te bereiken? (motivatie/doel))
- Waar heb jij de kennis die jij hebt van biodiversiteit opgedaan? Wanneer/hoe?

### **Korte Samenvatting**

### **Rol buiten functie/interesse biodiversiteit**

- Welke rol speelt biodiversiteit buiten jouw functie in jouw leven?
- Hoe is jouw interesse in biologie/biodiversiteit ontstaan? Waar komt deze interesse vandaan?
  - Proxies:*
  - Hoe?
  - Waar?
  - Door wie?
  - Door wat?
  - Wanneer? )

## Korte Samenvatting

We hebben het gehad over de rol die biodiversiteit speelt in jouw beroep (leven). Nu wil ik graag, ook in het licht van mijn onderzoek, een brug maken naar het algemeen publiek – een “doorsnee, gemiddelde Nederlander”.

### Algemeen Publiek/Kinderen

- Welke rol denk jij dat biodiversiteit speelt in het leven van gewone Nederlanders?
  - Waarom denk je dat? Hoe zie/merk je dat?
  - Kennis
  - Interesse
  - Waardering
  - Gevoel daarbij? (positief, negatief of neutraal?)
  
- Variatie tussen verschillende groepen mensen?
  
- Kennis → wat weten ze wel/niet, soorten?
  
- Eigen gevoel daarbij? (positief, negatief of neutraal?)
  
- We hebben het eerder gehad over de typen biologische kennis die voor jou belangrijk zijn bij het uitoefenen van jouw functie. Zit daartussen ook kennis die voor het algemeen Nederlands publiek van belang is? (biodiversiteit/soortenkennis)
  - **Waarom vind/denk je dat?**
  
- Je noemde eerder dat bepaalde typen biologische kennis belangrijk zijn voor het algemeen Nederlands publiek. Is er kennis waarvan jij zegt: dat zou een kind (van 9 of 10 (groep 6)) moeten weten of leren? Wat voor dingen? (voorbeelden vragen!)
  - **Waarom?**
  - Niveaus biodiversiteit

## Korte Samenvatting

### Potentie Nederland

We hebben het nu gehad over kennis van het algemeen publiek op het gebied van biodiversiteit en interesse van het algemeen publiek in biodiversiteit. Nu ben ik benieuwd naar jouw gedachten over eventuele potentie in Nederland voor Nederlanders om begrip van/voor biodiversiteit te ontwikkelen.

- Hoe zie jij de mogelijkheden voor een kind dat opgroeit in Nederland om kennis van biodiversiteit te ontwikkelen?
  - Proxies:
    - waar?
    - hoe?
    - wanneer?
    - bij wie?
    - directe ervaringen? indirecte ervaringen via media?
    - wild/dierentuin?

- Geldt bovenstaande ook voor het ontwikkelen van interesse in biodiversiteit?
- Geldt bovenstaande ook voor het ontwikkelen van waardering van biodiversiteit?
- Link kennis – interesse – waardering?
- Ik zou je graag een stelling willen voorleggen.

Hoe denk jij over de volgende uitspraak:

“Nederland is sterk verstedelijk. Daarom is het voor Nederlanders niet goed mogelijk om begrip en waardering te ontwikkelen voor biodiversiteit”

### Invloed van media

Biodiversiteit zie je niet alleen buiten, maar ook in de media (bijvoorbeeld tijdschriften, boeken, televisie). Ik ben benieuwd naar de rol die de media spelen en ben benieuwd welke invloed de media hebben op de kennis, interesse en waardering van biodiversiteit.

- Welke invloed denk jij dat de media hebben?
- Waarom? Voorbeeld? Welke invloed hebben media op jouw eigen beeld?

## **Interview Guide (English Version)**

### **Introduction:**

Thank for conversation

Short description research project and interview

Consent Form

### **Biodiversity & Role Biodiversity within (and outside) of profession**

- For clarity of this conversation I would like to start with the following question: What is, according to you, biodiversity?

- Could you tell me in what way(s) you are involved with biodiversity (or nature) in your profession (job)?

- Distinct examples?
- Follow-up-questioning; particularly about the profession where the interviewee communicates
- Who is your target group in communication?
- Profession 1, profession 2...

- What kind of biological knowledge do you use in your work?

- Abstract terms/concrete?
- Passive/Active knowledge?
- Examples?
- Taxonomy/Species Knowledge – what role does this knowledge play/how do you use this knowledge?
- Some questions more important than others?

**Short summarizing sentence:** You describe that in your profession you need certain biological knowledge (knowledge about biodiversity)

- In your profession(s) you are involved with biodiversity/nature. When you write a text/prepare a message for your target group (children/general public?)...

- how do you make sure that your message is understood by the target group and that it addresses the target group? (jargon?)
- how do you know what your target group will understand/knows? (estimation prior knowledge?)
- do you ever notice that you 'aim to high or too low'? Examples?
- (- what are you trying to reach? (motivation/goal))

- Where did you acquire the knowledge you have about biodiversity? When/how?

### **Short Summary**

### **Role outside of profession/interest biodiversity**

- What role does biodiversity play in your life outside of your profession?

- How did your interest in biology/biodiversity originate? Where did this interest stem from?

*Proxies:*

- How?
- Where?
- By who?
- Whereby?
- When?

## Short Summary

We talked about the role that biodiversity plays in your profession (life). Now, also in light of my research project, I would like to make a link to the lay public – an “average Dutch citizen”.

### General public/Children

- What role do you think biodiversity plays in the life of Dutch citizens?
  - Why do you think that? How do you see/notice that?
  - Knowledge
  - Interest
  - Appreciation
  - Feelings about this? (positive, negative or neutral?)
- Variation between different groups of people?
- Knowledge → wat do they know/don't they know, species?
- Feelings about this? (positive, negative or neutral?)
- We have talked about the different types of biological knowledge that are important in your profession. Is some of this knowledge important for the Dutch general public as well? (biodiversity/species knowledge)
  - Why do you think that?
- Previously you mentioned that certain types of biological knowledge are important for the Dutch general public. Is there knowledge that according to you a child (aged 9 or 10 (4th grade level)) should know or learn? What kind of things? (ask examples!)
  - **Why?**
  - Levels of biodiversity

## Short Summary

### Potential in the Netherlands

We talked about knowledge related to biodiversity present in the lay public and interest of the lay public in biodiversity. Now I am curious about your view about the potential in the Netherlands for Dutch citizens to develop perceptions of biodiversity.

- What opportunities are there for a child growing up in the Netherlands to develop knowledge about biodiversity?
  - Proxies:
    - where?
    - how?
    - when?
    - by who?
    - direct experiences? indirect experiences via the media?
    - wild/zoo?
- Does the above also apply for developing interest in biodiversity?
- Does the above also apply for developing appreciation of biodiversity?
- Link knowledge – interest – appreciation?

- I would like to present a statement.

What are your thoughts about the following statement:

“The Netherlands is highly urbanized. Therefore, it is not quite possible for Dutch citizens to develop understanding of, and appreciation for biodiversity.”

### **Influence of the media**

Biodiversity is not only encountered outside, it is also featured in the media (e.g. magazines, books, and television). I am curious about the role that the media play, and I am curious about what influence the media have on the knowledge, interest, and appreciation of biodiversity.

- What influence do you think the media have?

- Why? Example? How do the media influence your own perceptions?
